# Supplementary material for: chi-miR-99b-3p Regulates the Proliferation of Goat Skeletal Muscle Satellite Cells In Vitro by Targeting Caspase-3 and NCOR1
Source: MDPI journal article supplement (doi:10.3390/ani12182368), 2022-09-11
Supplement: s1 [file s1]

## Supplementary Figures

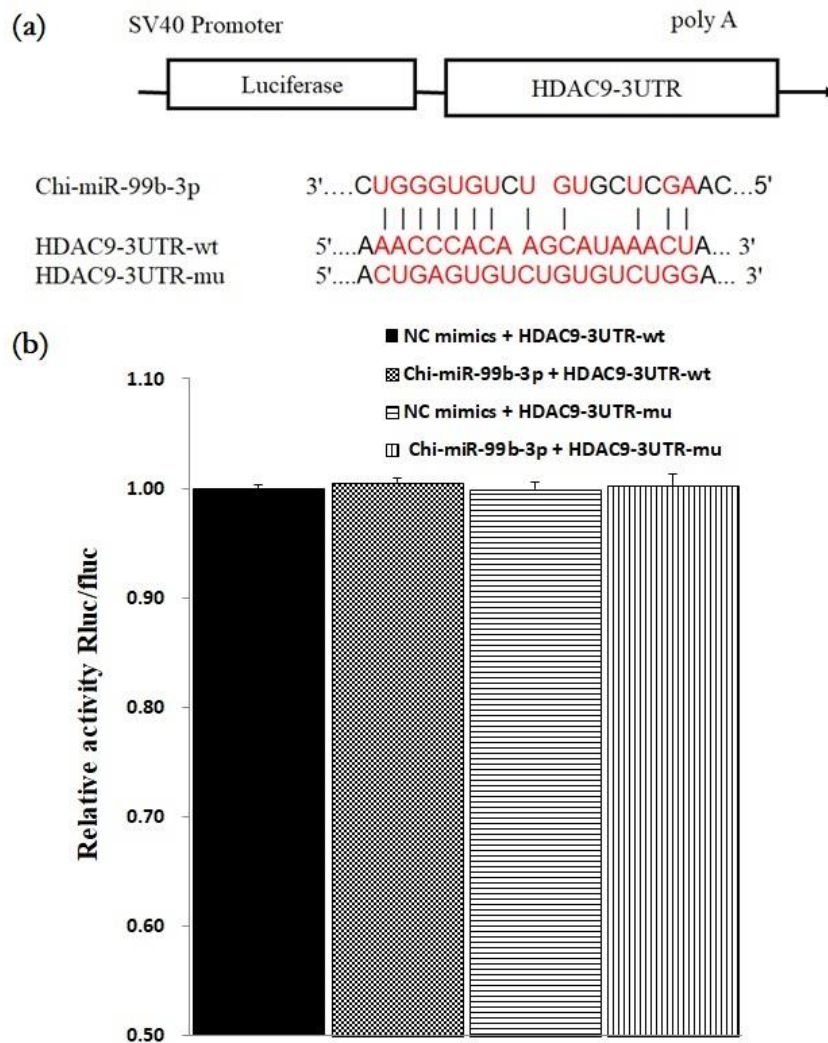

**Figure S1.** *HDAC9* is not the target genes of chi-miR-99b-3p, (a) Diagram depicting the binding sites of chi-miR-99b-3p on the 3'UTR of *HDAC9*, (highlighted in red). (b) Detection of relative luciferase activity. wt, wild-type. mut, mutant-type.

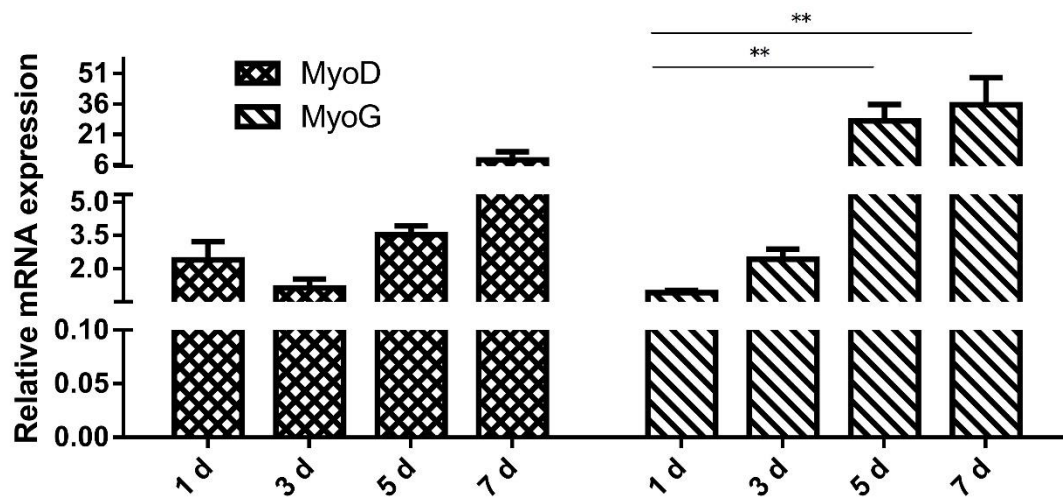

**Figure S2.** The mRNA expressions of selected targets during the differentiation of SMSCs.

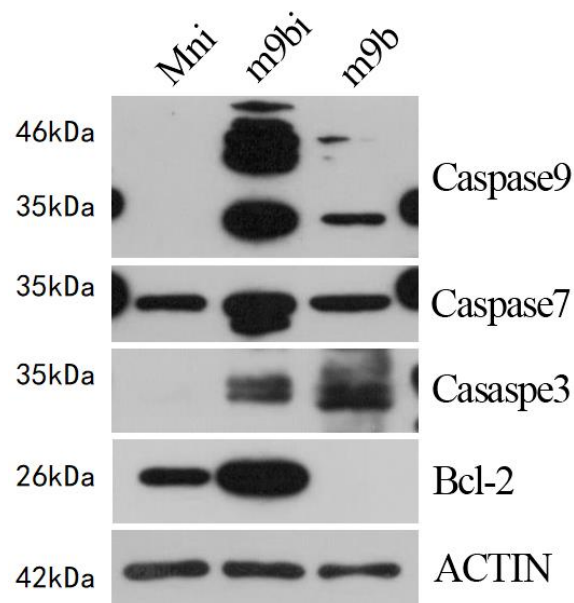

Figure 3a

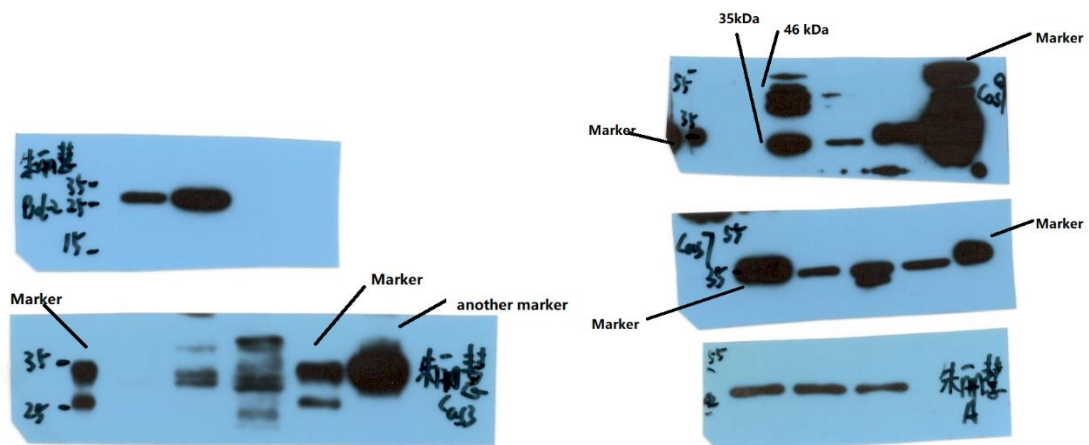

Figure S3. mRNA expressions of selected targets during the differentiation of SMSCs.
