# Supplementary material for: chi-miR-99b-3p Regulates the Proliferation of Goat Skeletal Muscle Satellite Cells In Vitro by Targeting Caspase-3 and NCOR1
Source: Animals (Basel). 2022 Sep 11;12(18):2368. doi: 10.3390/ani12182368 (PMC9495177; doi:10.3390/ani12182368)
Supplement: Supplementary file 1 [file animals-12-02368-s001.zip › Supplementary Tables.xlsx]

## Sheet: Table S1
Table S1. mimic/inhibitor sequence used in this study.
Chi-miR-99b-3p mimics	CAAGCUCGUGUCUGUGGGGUC	CCCACAGACACGAGCUUGUU
Chi-miR-99b-3p inhibitor	GACCCACAGACACGAGCUUG
scirbiled miRNA	CAGUACUUUUGUGUAGUACAA

## Sheet: Table S2
Table S2. Details of primer sequence used in this study.
Gene	5'-3'		Access number
Pax7	Forward	CCCCTGCCTAATCACATCC	XM_018054740.1
	Reverse	GTTTTCCCTCTTGTAGTCCTCA
MyoD	Forward	CTTCTATGATGACCCGTGTTTC	JF829005
	Reverse	GTTAGTCGTCTTGCGTTTGC
MyoG	Forward	GCCATCCAGTACATAGAGCG	KX056119.2
	Reverse	TTGTGGGCATCTGTAGGGT
Caspase-7	Forward	CTCAGGGAAATCAGTCAACATC	XM_018041622.1
	Reverse	TTGGCACAAGAGCAGTCGT
Caspase-9	Forward	GACCAGCAGACAAGCAGCAA	XM_005690814.3
	Reverse	CAGTGAATCCTCCAGAACCAA
Bax	Forward	AGACGGTGACCATCTTTGTG	XM_013971446.2
	Reverse	CAAGACCACTCCTCCCTACC
Bcl-2	Forward	TGACCGAGTACCTGAACCG	NM_001314213
	Reverse	CAGCCAGGAGAAATCAAACA
GAPDH	Forward	TGACCTTCACTACATGGTCT	XM_005680968.3
	Reverse	ACTTGATGTTGGCAGGAT
NCOR1	Forward	CCCACCTATGATGTTTGATGC	XM_018064717.1
	Reverse	CTGCGTTTTCCGTAGTTCC
HDAC9	Forward	GCTGTCGCATTTGTTCTTTC	XM_018047349.1
	Reverse	TTTGCCCAACATCACCCT
Caspase-3	Forward	TGAAAAGCAGAATCGGTGG	NM_001286089.1
	Reverse	GACCTGGACTGTGGTATTGAGA

## Sheet: Table S3
Table S3. Potential targets of chi-miR-99b-3p involved in the regulation of skeletal muscle development.
Function	Gene name (potential targets)
Voluntary musculoskeletal movement	HIPK2
Skeletal system morphogenesis	RAB33B, FMN1
Skeletal system development	ACP2, SOX4, PAPSS2, HOXA11, WDR5, BMP7
Skeletal muscle tissue development	CAV1, NCOR1
Skeletal muscle satellite cell migration	RHOA
Skeletal muscle fiber development, skeletal muscle satellite cell differentiation	SEPN1, MYLK2, KIAA1161, HLF, HOMER1
Skeletal muscle acetylcholine-gated channel clustering	LRP4
Regulation of skeletal muscle tissue development	TCF7L2
Regulation of skeletal muscle satellite cell proliferation	PPARD
Regulation of skeletal muscle fiber development	HDAC9
Positive regulation of skeletal muscle tissue development	PRKAA1
Negative regulation of skeletal muscle tissue growth	TLL2, Caspase-3
Muscle organ development | skeletal system development	AEBP1
Muscle contraction , stress fiber assembly	SORBS1
Muscle cell differentiation	SYNE1
Embryonic skeletal system morphogenesis	MEGF8, HOXB3
Embryonic skeletal system development	KIAA1217, PBX1, WNT11
Cytoskeletal protein binding	NEBL, PLEC
Cell growth involved in cardiac muscle cell development	SORBS2

## Sheet: Table S4
Table S4. DE genes associated with cell cycle pathway.
Gene Symbol	Description	log2 (Mimic / Control)	Fold change (Mimic / Control)	P value
TP63	Tumor protein p63	4.65183	25.1386	2.84918e-14
RAD21	RAD21 cohesin complex component	2.48001	5.57902	6.46806e-09
BCL2L11	BCL2 like 11	1.76872	3.40751	0.00030936
CTSH	Cathepsin H	1.62436	3.08305	0.000189864
GLUL	Glutamate-ammonia ligase	1.51607	2.86011	0.00187455
RRAS2	RAS related 2	-1.12353	0.45897	0.00350012
MCM7	Minichromosome maintenance complex component 7	-1.42384	0.372718	0.00122577
CDK6	Cyclin dependent kinase 6	-1.45208	0.365494	3.60043e-05
CTSC	Cathepsin C	-1.45462	0.364852	0.00011284
MCM3	Minichromosome maintenance complex component 3	-1.47547	0.359617	6.57495e-05
BUB1B	BUB1 mitotic checkpoint serine/threonine kinase B	-1.75495	0.296283	8.64291e-05
CDC45	Cell division cycle 45	-1.77693	0.291805	0.000832377
CDC25A	Cell division cycle 25A	-1.78961	0.289251	0.000540823
CDKN2C	Cyclin dependent kinase inhibitor 2C	-1.93014	0.262404	0.00100793
ORC1	Origin recognition complex subunit 1	-1.96219	0.256638	0.00399519
MCM5	Minichromosome maintenance complex component 5	-2.0703	0.23811	0.000138784
CDC20	Cell division cycle 20	-2.18651	0.219682	1.2828e-07
CDC25B	Cell division cycle 25B	-2.22463	0.213953	0.000260137
BUB1	BUB1 mitotic checkpoint serine/threonine kinase	-2.24165	0.211445	9.17392e-07
FBXO5	F-box protein 5	-2.27056	0.207249	0.00223862
CCNB1	Cyclin B1	-2.31957	0.200328	8.33818e-05
CCND1	Cyclin D1	-2.34659	0.19661	7.63512e-08
TGFB1	Transforming growth factor beta 1	-2.35858	0.194983	0.00064986
CCNA2	Cyclin A2	-2.408	0.188417	4.48227e-06
MCM4	Minichromosome maintenance complex component 4	-2.41148	0.187963	3.4867e-05
SGO1	Shugoshin 1	-2.48044	0.17919	6.59688e-07
E2F2	E2F transcription factor 2	-2.50844	0.175745	0.00195526
GTSE1	G2 and S-phase expressed 1	-2.54822	0.170966	0.000206681
BIRC5	Baculoviral IAP repeat containing 5	-2.88941	0.134959	0.000831225
ADGRB1	Aadhesion G protein-coupled receptor B1	-2.94206	0.130122	3.02393e-05
RRM2	Ribonucleotide reductase regulatory subunit M2	-2.94578	0.129787	0.000105852
MAD1L1	Mitotic arrest deficient 1 like 1	-3.0189	0.123373	0.00238393
LMNB1	Lamin B1	-3.05831	0.120049	1.47136e-06
LMNB2	Lamin B2	-3.1193	0.115079	8.85982e-05
E2F1	E2F transcription factor 1	-3.35464	0.0977579	1.59073e-06
AR	Androgen receptor	-3.41415	0.0938075	0.000485713
MCM2	Minichromosome maintenance complex component 2	-3.54027	0.0859554	4.26845e-05
MYBL2	MYB proto-oncogene like 2	-3.6542	0.0794285	1.48895e-06
FOXM1	Forkhead box M1	-3.73004	0.075361	8.53479e-07
ESPL1	Extra spindle pole bodies like 1, separase	-3.79794	0.0718965	4.50293e-08
ADCY5	Adenylate cyclase 5	-3.85291	0.0692085	4.96355e-08
PKMYT1	Protein kinase, membrane associated tyrosine/threonine 1	-4.04938	0.060397	2.58106e-05
BCL2	BCL2 apoptosis regulator	-4.33481	0.0495554	6.92933e-08
IGFBP3	Insulin like growth factor binding protein 3	-4.37318	0.0482549	7.56999e-08
SKP2	S-phase kinase associated protein 2	-4.41731	0.0468011	6.5152e-06
RBL1	RB transcriptional corepressor like 1	-5.4426	0.0229939	4.56818e-06
IL6	Interleukin 6	-6.98128	0.00791455	3.43998e-08
EGFR	Epidermal growth factor receptor	-7.18716	0.00686197	4.70315e-07

## Sheet: Table S5
Table S5. Potential targets of miR-99b-3p screened by DE genes.
gene	log2 (Mimic / Control)	Qvalue (Mimic / Control)	fold change
SGPP1	-1.51087	0.0399105	0.3509
OSBPL10	-1.53248	0.0461589	0.345683
WWC2	-1.67617	0.0473048	0.312912
SYNM	-1.75316	0.0305339	0.296652
NR4A3	-1.77246	0.0123073	0.292708
NUAK2	-1.99804	0.000247954	0.25034
SPRED2	-2.11502	0.0356585	0.230842
TMEM44	-2.15861	0.013982	0.223972
LRP4	-2.20445	0.0377581	0.216968
SCLY	-2.28699	0.00471614	0.204903
FAM83H	-2.61817	0.0317269	0.162874
PLEC	-2.68598	0.0493813	0.155395
SHANK1	-2.93308	0.0108207	0.130935
ARHGEF5	-2.97743	0.00564051	0.126971
LYSMD2	-3.04958	0.0287471	0.120777
DIAPH3	-3.05236	5.45225e-09	0.120545
ATP6V1B1	-3.055	0.00200003	0.120324
TTC4	-3.28174	0.0404084	0.102825
AKAP17A	-3.46489	0.0126223	0.0905658
SLC22A23	-4.16292	0.00010374	0.0558258
PRDM6	-4.32563	0.000513382	0.0498718
MELTF	-4.35456	0.0202362	0.0488817
DDIT4L	-4.4094	0.00797657	0.0470586
SLCO5A1	-4.71284	0.00115977	0.0381323
PRLR	-4.72057	0.00607283	0.0379287
CLSTN2	-4.73282	0.00132102	0.0376079
RCCD1	-4.88543	0.00209834	0.0338328
NUP210	-5.50722	0.0022481	0.0219867
PPP1R16B	-5.8612	0.000865894	0.0172029
SH2D4A	-6.20525	0.000703631	0.013553
ABCB10	-6.37738	0.000190441	0.0120287
B3GNT6	-6.74247	0.0001331	0.0093393
OPCML	-7.14005	0.000141321	0.00708973
SPATA13	-7.82293	0.000405144	0.00441635

## Sheet: Table S6
Table S6. List of DE miRNA in SMSCs after chi-miR-99b-3p upregulation.
Gene ID	log2 (Mimic / Control)	Fold change (Mimic / Control)	Pvalue	Qvalue
chi-miR-199c-3p	7.61059	195.441	3.87302e-09	8.0462e-07
chi-miR-199a-3p	6.40459	84.7173	6.82638e-05	0.00378181
chi-let-7c-3p	4.10357	17.1908	4.08231e-05	0.00260954
chi-let-7c-5p	3.38949	10.4794	1.02384e-10	2.83604e-08
chi-miR-10a-5p	3.09461	8.54223	9.67495e-11	2.83604e-08
chi-miR-125b-3p	2.52084	5.73918	0.000267913	0.0101198
chi-miR-99a-5p	2.32818	5.02172	2.3433e-06	0.000216364
chi-miR-155-5p	2.09154	4.26202	0.00116584	0.0272029
chi-miR-660	1.64225	3.12153	0.000654878	0.0201557
chi-miR-27a-3p	1.55063	2.92944	0.00117847	0.0272029
chi-miR-532-5p	1.45093	2.73385	0.000586604	0.0187488
chi-miR-542-5p	1.40486	2.64793	0.00221961	0.0419203
chi-miR-34c-5p	-0.992344	0.50266	0.00100001	0.0259691
chi-miR-378-3p	-1.18017	0.4413	0.00182053	0.0378215
chi-miR-22-3p	-1.1995	0.435427	0.00273641	0.0483821
chi-miR-148a-5p	-1.20403	0.434062	0.00194999	0.039523
chi-miR-1388-5p	-1.39642	0.379872	0.000904322	0.0242417
chi-miR-1249	-1.54889	0.341773	8.72992e-05	0.00426739
chi-miR-671-5p	-1.62773	0.323598	0.00103611	0.0260912
chi-miR-140-3p	-1.63312	0.322391	1.77996e-07	2.46524e-05
chi-miR-19b-5p	-1.65605	0.317308	0.00109302	0.0267148
chi-miR-296-3p	-1.6769	0.312753	0.00244053	0.0440886
chi-miR-146a	-1.75565	0.29614	0.000193681	0.00804744
chi-miR-218	-1.88633	0.270494	0.000570653	0.0187488
chi-miR-490	-2.32725	0.199263	3.75786e-07	4.46112e-05
chi-miR-449c	-2.54281	0.171608	4.42439e-07	4.59583e-05
chi-miR-1248-5p	-4.04592	0.0605419	0.000237218	0.00938705
chi-miR-184	-4.8384	0.0349541	0.000185752	0.00804744
chi-miR-376c-3p	-6.05799	0.0150094	0.00180845	0.0378215
chi-miR-199b-3p	-7.8805	0.00424358	1.43148e-18	1.18956e-15
novel-chi-miR650-5p	3.6015	12.1383	0.0021535	0.0416177
novel-chi-miR1574-3p	2.92825	7.61187	0.000545009	0.0187488
novel-chi-miR1878-5p	2.46996	5.54027	0.000728229	0.0208675
novel-chi-miR1283-5p	1.7796	3.43332	6.165e-05	0.00365937
novel-chi-miR148-3p	-1.26313	0.416638	3.97397e-05	0.00260954
novel-chi-miR2072-5p	-2.65338	0.158947	0.00215319	0.0416177
novel-chi-miR166-3p	-2.81747	0.141859	0.000843675	0.0233698
novel-chi-miR374-3p	-2.86095	0.137647	0.00133479	0.0291896
novel-chi-miR2097-3p	-2.89383	0.134545	8.38725e-06	0.00069698
novel-chi-miR366-3p	-3.98956	0.0629537	1.33727e-05	0.00101025
novel-chi-miR1344-5p	-4.00191	0.0624174	0.000162167	0.00748672
novel-chi-miR1948-3p	-4.01239	0.0619654	8.34258e-05	0.00426739
novel-chi-miR973-5p	-4.04285	0.0606709	0.00122631	0.0275423
novel-chi-miR1924-5p	-4.36322	0.0485893	0.00234915	0.0433809
novel-chi-miR1543-5p	-4.60368	0.0411295	0.000708853	0.0208675
novel-chi-miR669-5p	-5.78124	0.0181833	0.000572323	0.0187488
novel-chi-miR439-5p	-6.20221	0.0135815	2.69609e-08	4.4809e-06
novel-chi-miR439-5p	-6.20221	0.0135815	2.69609e-08	4.4809e-06

## Sheet: Table S7
Table S7. Overlapping genes screened by DE genes and predicted targeted of DE miRNAs.
Gene Symbol	log2 (Mimic / Control)	Qvalue (Mimic / Control)
TLR2	-4.84094	0.00607283
RSPO2	3.29973	7.11229e-10
LOC100860781	2.46258	0.000707984
IL6	-6.98128	7.9856e-06
BMP4	-2.46965	0.0241422
BMP6	-3.80561	0.031561
CHI3L1	2.16854	0.0402099
C3	2.48694	0.0118148
AR	-3.41415	0.00966462
ARG1	-5.18481	0.00573259
SLC2A3	-5.2527	0.0214629
COL3A1	1.65351	0.0128163
DCN	3.44392	0.00119522
VEGFA	-3.11729	0.000230654
CD36	2.96606	0.025092
LOC100860959	5.69378	0.00689846
BMF	3.38698	0.0105133
RBMS1	-1.48572	0.0321671
ORMDL1	-5.74412	0.000280496
MAP2	-4.87201	5.09019e-06
SERPINE2	-1.28616	0.0374631
LTF	-6.4446	0.000401482
SELENOP	4.33502	0.000392027
PLIN2	-4.5926	0.00564051
BCL2	-4.33481	1.3638e-05
MRS2	-5.18808	0.000869302
CACNA1C	1.48401	0.0223401
ST6GAL1	-3.28486	0.0303302
PRLR	-4.72057	0.00607283
LOC100861326	2.32366	0.0162325
ACP1	-1.9508	0.0277208
NIF3L1	-6.6459	0.000240171
HIF1A	2.86959	0.023391
CHL1	-6.146	0.000406812
TCEAL4	1.99906	0.043603
SLC49A3	-2.52347	0.0056913
LBH	-1.79796	0.000959733
EFNB3	-2.74054	0.000629865
BMPER	4.70019	3.83454e-06
SNCAIP	3.85684	0.0327053
TIAM2	-1.7021	0.000314689
ZFPM2	-4.48335	0.00633505
LOC102168428	3.94534	8.52206e-08
PIF1	-4.35092	0.00142981
CPOX	-2.65586	0.0154388
ZCWPW2	-5.27372	0.00477094
COLEC12	-1.98974	0.00276179
SPRED1	-3.41471	0.000956125
CCDC157	-2.57404	0.0391519
PGLYRP1	-3.73187	0.0337818
EIF3B	-2.78339	0.0157798
SLC23A1	5.24416	0.017422
RGS2	3.08767	1.42823e-08
ESM1	-3.27828	4.69001e-11
FAM180A	-4.53047	0.0291476
CWH43	-5.2868	0.0251015
LOC102168731	-5.4508	0.0050024
SPATA13	-7.82293	0.000405144
KLK10	-5.14123	0.0369288
TLCD1	-2.31331	0.00153426
KIFC1	-3.541	0.00224235
MDGA1	-1.86101	0.0387151
DIAPH3	-3.05236	5.45225e-09
FERMT1	-3.70048	0.00428172
PDGFC	-1.85682	0.00057396
CALCOCO2	2.14409	0.0168797
NTS	3.88129	1.62778e-09
AEBP2	-3.99792	0.00286572
OMD	3.73788	0.0356339
PIMREG	-3.91888	1.42823e-08
UBALD2	-2.73593	0.0218381
MCM5	-2.0703	0.00363671
HS3ST1	-6.49608	0.000544243
LOC102169149	4.4746	0.0223642
SGCB	-5.53048	0.000806512
GPC6	3.56067	1.77089e-15
LOC102169338	-6.91563	0.000172041
NCAPG2	-1.97191	0.000478359
LOC102169407	-6.80831	0.000276846
PNMA8B	-6.03543	0.0103947
HSPB3	-4.99781	0.00229915
CD99L2	1.35427	0.0104916
SRPX2	-3.0941	4.97334e-05
CDCA3	-2.12648	0.000123076
TNFRSF6B	-2.93999	0.00993983
TINAGL1	-4.21081	2.01565e-13
COL6A3	-2.70114	0.0450478
CCND1	-2.34659	1.4612e-05
SCUBE2	2.2208	0.0293495
BCL6	1.47827	0.0362778
AMOTL2	-2.25451	0.000872648
PWP2	-2.42087	0.0268076
CDKN2C	-1.93014	0.0168264
PDGFRL	1.90646	0.0178674
EDIL3	2.60567	0.0159742
GDF6	-3.58804	9.38517e-11
MSX2	2.89241	1.01681e-07
BST1	-1.15209	0.0374631
LOC102169849	-4.41981	0.00313208
LOC102169935	-5.71937	0.000975435
MMGT1	-3.03662	0.032977
SHCBP1L	-3.15906	0.0244354
LOC102170144	2.79378	0.000120627
OSBPL10	-1.53248	0.0461589
FBXL19	-2.98976	0.0413194
TAAR1	-5.38244	0.00343615
CNST	-3.46847	0.00713042
ARHGAP11A	-2.90876	2.29049e-08
ST6GALNAC4	-1.28253	0.0171396
SBSPON	-4.67842	7.20183e-05
CHSY3	-1.49144	0.00690553
LHFPL6	-2.59636	0.000338391
SST	-7.90352	0.0209661
NOM1	-3.67767	0.00407693
PALD1	-2.3708	0.0157507
FAM241A	-2.05431	0.0219285
GDF15	-2.55274	0.000904772
ALDH2	1.42604	0.0041786
SLC6A6	-2.25286	4.99396e-05
FOXM1	-3.73004	9.3963e-05
MMP1	-5.0753	0.00349533
ASPM	-2.54913	3.45022e-10
FANCA	-2.22436	0.0195486
CTSH	1.62436	0.00469089
NGEF	-2.25598	0.00533999
LOC102170698	-6.19969	0.000947594
G6PC	-6.17729	0.00083367
CMTM8	-2.71636	0.0113012
ANKRD44	2.27432	0.0388555
PSRC1	-2.37682	0.000816906
EFCAB13	-7.3216	9.3963e-05
MAD1L1	-3.0189	0.033052
LOC102170850	-1.39212	0.0447876
FNDC1	-2.14914	0.0136681
ZNF8	-2.50867	0.0369476
RASGRF1	-4.00113	9.84431e-07
WNT5A	-1.52721	0.00802345
LYSMD2	-3.04958	0.0287471
SELE	-5.2299	0.000592885
ISLR2	-2.76088	0.0369241
ENC1	-3.00251	4.32684e-05
LEMD2	-2.92218	0.0252567
HR	-3.48329	0.00896045
IGSF9	-2.28404	0.0108207
DCTPP1	-2.5565	4.81927e-06
PRKAA2	-3.37509	0.00230557
OPCML	-7.14005	0.000141321
SEMA6B	-3.81123	0.0219042
LOC102171344	-1.70016	0.00530602
ITIH5	-6.39934	0.0052065
TRPM2	-6.11301	7.78628e-09
TTLL4	1.26003	0.011723
MCM3	-1.47547	0.0021034
F2RL2	4.7219	9.82674e-05
WWP1	2.19205	0.0219285
LOC102171473	-3.67601	0.0021997
HFM1	-3.94846	0.0124687
CDC20	-2.18651	2.13097e-05
TMEM47	-2.29089	0.00644893
HMGA1	-3.77733	0.000879737
INCENP	-3.23579	0.0093385
RASSF8	-3.65727	0.0241018
BCL2L11	1.76872	0.00681023
STK32A	-3.49854	0.0133902
RASL10B	-2.01457	0.0311568
MINAR1	-5.96416	0.00083367
FUS	-1.4664	0.023391
ITSN1	1.98641	0.000413407
LOC102171944	-3.5194	0.000292299
REEP4	-1.28105	0.0337617
KIF14	-3.09631	2.30285e-06
LOC102172019	-2.29075	0.0441509
BHLHA15	-4.7377	0.0337091
FOSL1	-1.91746	0.0136681
TENM1	2.04477	0.00669893
NDUFA3	1.81656	0.0411924
EFCAB5	-3.4045	0.0337111
LOC102172109	-1.40739	0.0404217
PRKCB	-6.31502	0.000123076
TRIM72	-5.24262	0.0063393
YBX3	-2.979	0.0194977
LOC102172133	-2.37622	0.0230168
NOX5	-6.38426	0.000240638
TVP23A	-5.53253	0.0321851
THRB	1.68996	0.00070499
S1PR3	3.33235	0.00499566
MAN1A1	-2.06865	0.0352132
EPB41L3	-4.91745	0.00295187
LTBP3	-2.38883	0.0052065
LOC102172428	-6.20867	0.000514122
SSBP2	3.30229	0.0168264
FRRS1L	-2.97506	0.00695569
NTMT1	-2.31596	0.0475702
DDX51	-2.40206	0.0178947
NT5C	-3.18514	0.00105427
NUP210	-5.50722	0.0022481
UNC5CL	-5.13602	0.00163833
PRR5L	-3.6877	2.25454e-06
NXT1	-1.91584	0.00743678
CYYR1	-4.10003	0.0140162
EHBP1L1	-3.52744	8.54794e-05
METTL17	-2.59199	0.0482732
BUB1	-2.24165	9.82912e-05
SKP2	-4.41731	0.000383528
EGFR	-7.18716	6.21605e-05
ELP6	-5.21684	0.000949173
PRAG1	-2.6787	0.00204382
LOC102172790	-2.43315	0.0374631
SLC25A43	-6.76309	0.000214806
PRR36	-3.1868	0.0326533
LOC102172949	-12.2464	0.0254623
ME2	2.15365	0.000453587
CHAF1A	-3.44449	0.00302764
LOC102172995	-4.6325	0.018247
E2F1	-3.35464	0.000145471
PROSER2	-2.28416	0.00902007
INAVA	-3.16958	0.000773347
PGRMC2	-1.98213	0.039889
IL34	-2.70207	0.000429373
NES	-2.53428	0.0173308
WDR90	-3.2987	0.0146178
TTC4	-3.28174	0.0404084
BACH2	3.077	0.0318225
AGPAT2	-1.27497	0.0442839
LOC102173205	-6.02833	0.000806512
BEAN1	-2.0366	0.0411462
ADM5	-2.82768	0.0213051
LOC102173237	-3.53172	0.0314991
LOC102173247	-1.89134	0.0490991
PTPRM	-3.03886	0.0131678
RBMX	-2.31469	0.0452064
MCM2	-3.54027	0.00148919
ISLR	1.68879	0.0195732
DIPK1B	-6.20154	0.00496276
TMEM65	-2.6959	0.0104023
SLC39A6	1.83325	1.2952e-05
USP43	-4.73491	0.000253753
SAP25	-3.97792	0.00398901
PDE10A	-5.8211	0.00105173
NKAIN1	-2.16034	3.5672e-08
CCNF	-4.14426	1.92557e-05
SFRP5	-3.0983	0.0461328
LOC102173804	-2.57112	0.0136681
CDCA8	-2.23281	0.0033809
PLXNA4	3.12257	0.017756
HEBP1	1.34248	0.0443462
RAG2	-6.62768	0.00601142
ACMSD	-5.44023	0.00117372
MDFI	-2.38819	0.0440861
DEPDC1	-1.83963	0.0208837
LOC102173909	-4.37663	0.0389856
TPBG	-3.79689	0.00137849
CALHM5	-3.59615	0.00162791
NMB	-4.45891	0.00476868
GRID2IP	-6.9802	0.000188292
KANK3	-3.08979	0.0326533
UVSSA	-2.61546	0.041169
RALYL	-6.63857	0.000265837
EDNRA	1.66264	0.0139486
LIG1	-3.11532	0.0113559
ILDR2	-4.10699	0.00131759
DUSP4	-2.78309	0.011723
LOC102174202	2.84947	0.000799645
CCDC3	-2.20635	0.0222807
KIF21B	-2.22666	0.000631422
AURKB	-3.72348	3.75039e-14
PDGFA	-2.51182	0.00337058
HJURP	-2.60327	4.32684e-05
PALM3	-2.94039	0.0241422
FAM167A	-2.53748	0.000314689
TENT5A	-0.969634	0.0452526
C14H8orf82	-3.27681	0.0182964
ZSWIM9	-3.9314	0.00689846
LOC102174428	-3.30156	0.0158172
PLD1	-7.06822	9.64654e-05
PADI4	-6.609	0.000330549
LDB2	-4.72299	0.00477094
ESRRG	4.35091	0.000208394
ZNF316	-2.84347	0.0302259
CNNM1	-2.07521	9.64654e-05
IGFBP3	-4.37318	1.4612e-05
FBXO5	-2.27056	0.0316549
FAM72A	-3.04003	0.000598016
POLE	-2.34639	0.00105631
SOX5	2.82495	1.47854e-05
RECQL4	-3.37575	0.00313708
TPH2	-3.45546	0.00900046
SGPP1	-1.51087	0.0399105
SEMA3F	1.77973	0.000277559
OPRD1	-6.07002	0.042732
FAM20C	-2.50804	0.0380335
MID1	1.65257	0.00348248
H6PD	-2.38024	4.11642e-05
UGCG	-2.4263	0.000132979
C16H1orf158	4.98828	3.30162e-06
USP49	1.64899	0.0245649
NCAM2	-8.06134	0.0182696
MCM4	-2.41148	0.00128543
SPSB1	-2.46292	8.97267e-07
SPC25	-2.8524	0.00081026
IGFBP2	-5.76789	1.69597e-07
LOC102175184	-4.28739	0.00405491
SUSD1	-5.06792	0.00126308
TMEM132D	-2.58721	0.000160924
LOC102175315	6.07237	4.32684e-05
TMEM108	-3.6966	0.0111891
IQGAP3	-3.2984	6.76049e-05
DSP	3.35271	0.0450812
RAMP3	-6.39306	0.00123672
RBM47	2.97448	0.000806512
ANKLE1	-4.39469	0.00524293
FKBP5	3.17692	0.00255297
F11R	-5.77485	0.00268794
CITED2	2.03694	0.00045697
HEXD	-2.26918	0.00904856
CYTIP	-5.44505	0.0293955
SHISA9	-6.17331	0.0190006
LYNX1	-2.82585	1.88538e-05
SLCO5A1	-4.71284	0.00115977
ZNF74	-2.50457	0.0463137
NT5DC1	-4.14584	0.0128185
EXO1	-2.26713	0.0305571
DGKI	-4.90896	5.30671e-09
CBARP	-1.95056	0.0406661
PRDX6	2.88178	7.51339e-09
CFB	4.493	6.94495e-06
KCND3	-5.12877	0.000475133
LOC102175825	-4.20979	0.00573397
TMEM178B	-2.94068	0.000190441
IBSP	-4.12218	0.011723
PLEKHG3	-6.49753	0.00030489
ETV4	-5.68245	8.98805e-07
EDN1	-2.4328	0.0475702
UBQLN4	-3.78306	0.0113682
SCLY	-2.28699	0.00471614
GPBAR1	-3.86629	0.00974619
BUB1B	-1.75495	0.00255297
PEX2	-3.78688	0.0111891
ADAT1	-4.05384	0.0097982
HASPIN	-2.6585	0.0013313
TRAIP	-4.88595	0.000653811
RXFP4	-4.78504	0.00143832
CHTF18	-3.07199	0.00643504
MSRA	-3.35806	0.0100927
GABRR2	-4.99524	0.00509039
MARCHF11	-3.06414	0.0039398
ENPP6	-6.21983	0.000947594
NCAPD2	-1.99852	0.00829171
WNT5B	-2.54828	0.00261225
PRDM6	-4.32563	0.000513382
ANKRD45	-5.19533	0.00189048
CCDC114	-2.65692	0.0421115
PKMYT1	-4.04938	0.00103626
TROAP	-3.48986	0.000292299
SORCS2	-3.37478	0.011723
SLC1A5	-1.2251	0.0209593
ZC3HAV1L	-4.18997	0.00564051
SGK1	3.04712	0.000978008
THSD4	-2.56421	0.000172304
TONSL	-3.44206	0.00224235
BRI3BP	-4.51353	0.00330782
EMP3	-3.24539	0.00900046
LOC102176695	-5.36792	0.0017547
LRRC32	-6.27493	0.0108804
LOC102176721	-3.54536	1.20535e-05
EIF5A2	-2.91684	0.0246018
RAD54L	-2.68157	1.68938e-05
ATCAY	-5.37036	0.00274653
LOC102176915	-5.25542	0.024019
STEAP4	-5.71751	0.00105557
COL4A5	3.48061	0.0010993
TPP1	1.16394	0.0450779
SPRED3	-2.31746	0.00741162
TNFRSF12A	-1.53899	0.0045596
TMEM38A	1.66846	0.00131386
RTN4RL1	2.96678	0.0211683
NUF2	-2.37416	0.000922367
LOC102177175	-5.12013	0.00469089
B3GNT6	-6.74247	0.0001331
FAM98C	-2.55779	0.0202559
TMEM44	-2.15861	0.013982
NCAPH	-2.02949	0.00205723
C16H1orf116	-4.47568	0.0254644
NGB	-4.73116	0.00220586
GALNT13	-3.09983	0.0196168
TAFA1	-6.34473	0.000428278
KLRG2	-5.18649	0.00184323
GTPBP6	-4.41036	0.00259197
LOC102177561	-4.34059	0.0246018
MIS18A	-2.54525	0.00664117
GSG1L	-4.28948	0.00644893
CD27	-5.72167	0.00170949
POF1B	-3.43005	0.0398821
DDIT4L	-4.4094	0.00797657
LOC102177619	-6.05565	0.00115984
PCDH10	1.73782	0.0297784
CCDC85C	-2.72903	0.0457163
LMTK3	-3.04215	0.0146178
PLEKHD1	-3.33405	0.0165721
BCL11A	2.99216	0.0368136
STMN2	2.7604	0.00083367
LOC102177821	-2.67186	0.0421115
ESPL1	-3.79794	9.82344e-06
TBXA2R	-1.11671	0.0356339
LOC102178027	-2.78971	0.0459022
CLDN15	-1.96713	0.039889
GTSE1	-2.54822	0.00498983
ARHGEF39	-2.28434	0.00049205
SLC25A33	-1.75927	0.0209593
SLC22A23	-4.16292	0.00010374
XPO6	-1.24606	0.015569
UTS2	-4.36563	0.00789413
MELTF	-4.35456	0.0202362
CRLF2	-7.0573	0.000155809
CENPV	-2.52618	0.0033072
LOC102178319	-1.54862	0.0328541
MAB21L1	2.12942	0.0140861
DACH1	-1.60057	0.0143147
SNTB1	-5.07005	0.00297461
CCDC9	-3.63421	0.0127443
FGF18	-4.79225	0.0073728
MPLKIP	-2.78352	0.0489866
LOC102178426	-2.19577	0.00493493
LMNB2	-3.1193	0.00259587
VEPH1	3.849	0.0157618
PTGER3	4.53245	0.0234933
EBF1	3.60957	7.16494e-06
SMC6	-5.02747	0.00137005
NUDT7	-3.57088	0.00496276
SH3BGR	3.29784	0.00455346
VWA7	-2.8976	0.00242862
HOPX	3.71868	0.0052065
LOC102178740	-4.95577	0.0321574
CTNND2	-4.44418	0.0224588
CPXM2	-5.46583	0.000245089
CLEC5A	-5.28559	0.00170419
ZDHHC24	-3.14739	0.0435283
IPO4	-2.05248	0.0316117
LOC102178870	-2.13788	0.0325207
SH3RF3	-4.30159	0.00776609
C16H1orf115	-1.6611	0.00231942
C23H6orf223	-6.85123	0.00019369
PTGFRN	-1.87078	0.0443319
PLCE1	2.28573	7.68813e-05
SWAP70	1.51897	0.00456724
TNFSF18	-7.20463	8.21946e-05
FAT4	2.33187	0.0414204
TEX2	-1.28909	0.0202362
C5H22orf23	2.01184	0.040221
CA5B	-3.04731	0.000392274
RBL1	-5.4426	0.000299695
MAMSTR	-3.2679	0.0372837
ADORA2B	-2.89528	0.0069782
PTPRN	-2.18158	0.0157775
ABCA1	1.48476	0.0213051
TNC	-3.69266	0.000303556
CDC25B	-2.22463	0.00595488
CRACR2B	-5.16415	0.000151478
TRMT5	-3.65946	0.00666297
CACNB4	-4.86959	0.00133769
SERPINB1	-2.97	4.37693e-08
CSGALNACT1	-5.82535	0.000189135
P2RY8	-6.78785	0.000301084
LOC102179380	3.13087	0.00797657
ADRB2	-2.66373	3.3876e-06
TMEM243	-2.45915	0.0446036
CFTR	3.26244	0.0132887
CELF5	-6.5267	0.000346507
LOC102179469	-1.8676	0.0223642
RNF149	-2.33699	0.0319582
EGLN3	3.04441	0.000159638
DIO2	-5.29387	0.00205054
EHHADH	2.8953	0.00219361
LOC102179628	-6.59066	0.000349161
SH2D4A	-6.20525	0.000703631
MTTP	4.08359	0.017422
AKAP17A	-3.46489	0.0126223
LRCH1	-1.53542	0.0468098
VSTM2L	-3.05319	0.000741763
TNKS1BP1	-3.35979	0.0288052
GAS7	-4.04602	0.00764679
DDX18	-3.19511	0.0100642
LY6G6C	-4.3791	0.0305339
ZBTB6	-5.18553	0.000507868
PPP1R26	-2.58288	0.0444362
SLC16A6	-2.79282	0.0304099
COL23A1	-4.75236	0.00229915
PRICKLE2	1.64464	0.00231942
BTN2A2	-4.11451	0.00806345
MINDY1	1.02975	0.0405623
PCDH17	-2.1334	0.00016723
PHF19	-3.24948	0.00381164
CENPW	-2.21318	0.000909327
BIRC5	-2.88941	0.014542
LOC102180106	-5.8045	0.00126506
CDK6	-1.45208	0.00131437
PDXP	-1.43467	0.0167889
NTRK2	3.62647	7.42147e-05
LGR4	-1.90368	0.0476391
LIPH	-4.20292	0.00783131
LY6G6D	-5.64026	0.0410917
FAM189A2	-4.46363	4.97334e-05
AXIN2	-3.40742	0.00640329
TMPRSS2	-5.61063	0.00327951
ANGPT4	3.14305	0.0226711
NSUN2	-2.38685	0.0456251
ADAMTS17	2.34499	0.0152413
WDR86	-2.5723	0.0146178
LOC102180554	-4.01545	2.61345e-07
C8H8orf58	-2.37925	0.03695
SPRED2	-2.11502	0.0356585
EMILIN1	-2.92004	0.0332985
P2RY2	-2.0595	0.000872227
LOC102180728	-5.22064	0.0022687
LOC102180747	-5.60175	0.000345063
FAM83D	-3.2077	1.59646e-08
LOC102180906	-1.35225	0.012408
MKNK2	-1.47255	0.0315963
ADAMTS16	2.45303	0.0200278
RARRES1	3.41164	5.52388e-08
NAB2	-1.73954	0.00766956
FGD4	-2.78748	0.0412064
CDCA2	-2.26191	0.0278544
FAM120B	-3.69082	0.0118996
MDGA2	-3.01474	0.0424186
STAU2	-3.94002	0.011723
CMKLR1	-8.75467	0.00834862
REV3L	3.38551	6.28864e-07
CENPA	-3.30691	5.17022e-06
FLVCR1	-2.88859	0.00764679
OSGIN1	-3.43008	0.00131457
WRNIP1	-2.82089	0.0131789
DSCAML1	-4.801	0.00462923
DPH3	-5.21353	0.000490016
KCNK12	-4.1182	4.10799e-06
CCN3	2.15391	0.033731
PAPLN	-2.95719	0.00300793
RND1	-1.92624	0.0104023
TMEM178A	-2.44992	0.0162229
TRIB3	-2.01047	0.0284713
RDH13	-2.28954	0.0430653
PDZD2	2.71105	0.000517086
SYNM	-1.75316	0.0305339
LOC102181552	-4.50143	0.000606029
LOC102181554	5.1105	0.021374
LOC102181614	-4.57932	0.00692747
PHETA1	-2.14106	0.024846
FHIT	-5.61779	0.000846638
LOC102181641	-3.45934	1.2952e-05
KLF9	2.4636	0.0373742
OIP5	-2.54973	0.00176929
HEXB	1.59791	0.00441838
CDC25A	-1.78961	0.0104847
COL11A2	-4.12235	0.0152586
EZR	-1.56145	0.00776826
MAP9	-4.19125	0.00959487
LOC102181832	-5.34587	0.00220586
LOC102181879	-2.71854	0.0443102
NUAK2	-1.99804	0.000247954
SH2B3	-2.21175	0.00177341
LOC102181949	-6.78029	0.000276398
C1QL3	-1.89535	0.0480752
FLRT2	3.26534	1.2952e-05
ACSF2	1.45806	0.00530602
PGPEP1L	-5.08458	0.00195451
CLIC5	-3.0876	2.489e-07
CDH20	-6.02521	0.000310987
LOC102182115	-11.0361	1.11252e-05
LOC102182119	4.9305	0.00213202
APIP	-5.67368	0.00081028
ATG3	-2.43619	0.0273781
RING1	-2.6138	0.0473355
SLC51B	2.89869	0.0166787
CCDC88C	-1.94459	0.0303302
MAFF	-2.31248	0.038757
THAP6	-2.84575	0.0310626
SLC22A17	-2.12803	0.0389028
CD44	-3.1176	0.00323353
ACTA1	2.73846	0.0420449
SIGLEC10	-5.09993	0.0164184
THBD	-2.97896	2.28871e-06
C23H6orf141	-3.33667	0.000248436
SLC14A2	-6.81328	0.0382756
FAM124A	-7.12929	0.00405491
SCRIB	-2.87413	0.0411924
MFSD4A	-5.18482	0.0065044
ADRA1A	-5.06797	0.000175958
IL1RN	-2.91024	0.00163833
SLC24A2	-7.30383	0.000108125
UAP1L1	-3.06132	0.00863623
GZF1	-1.84967	0.00610158
RIN3	-1.86036	0.0280136
CDH24	-2.14649	0.0276479
FAM83H	-2.61817	0.0317269
TRIM44	-3.92775	1.68938e-05
SLC45A3	-4.2601	7.92256e-07
RCAN2	4.44857	0.00538805
ERV3-1	7.50985	5.17022e-06
CHGA	-4.23422	0.00615713
ZCCHC2	-2.82003	0.0305115
GNG7	1.55043	0.0136532
MKI67	-3.38704	1.68938e-05
ABCB10	-6.37738	0.000190441
DDX11	-2.55097	0.0347961
TXNIP	2.63776	0.00131241
PAK3	-2.1859	0.00438516
ATP1B4	-5.55177	0.00109453
BATF3	-3.62952	3.2608e-05
HSD11B2	2.9554	0.0249186
SGPP2	-5.01022	0.00272147
LOC102183471	-3.12861	0.0404272
NUPR1	2.06061	0.000123076
GJC2	-2.83799	0.0209593
SPOCK1	3.41805	0.00013733
GINS2	-1.99284	0.00846757
IRGQ	-1.29495	0.012212
CROCC	-4.83618	0.00100009
LOC102183750	1.52054	0.00994534
FFAR4	-6.82183	0.000171834
MYBL2	-3.6542	0.000138258
LOC102183805	-5.1708	0.00267658
RAD21	2.48001	2.05469e-06
UBE2S	-1.72097	0.0203475
LTBP2	-4.5048	1.14407e-08
PRELP	-2.91216	0.0133722
NPTXR	-1.84648	0.00108264
CCM2L	-6.06695	0.00124305
KCNQ5	-7.40356	0.00106558
UNC5B	-1.45136	0.022094
MFSD10	-2.45414	0.0411462
TDP1	-1.82445	0.04701
RXFP2	2.33699	0.032017
UTP23	-4.87505	0.00329946
TMEM190	-4.17365	0.0034716
MMP28	-3.19357	0.0180645
LOC102184089	-5.12686	0.000345201
LOC102184120	-2.68154	2.42694e-05
SLC25A22	-2.09103	0.0249752
HMGXB3	-1.31694	0.02143
SYNE2	1.46644	0.0324844
CADM4	-2.81541	0.00371984
DPP4	5.62523	5.76408e-08
KCNC4	-4.00337	0.000189241
LOC102184252	-5.17074	0.0441894
GPR75	-3.11245	0.00534722
PLA2G12A	-1.04193	0.0459022
GABRB2	4.01025	0.0237904
CCN5	-2.09783	2.05469e-06
IL11	-3.79445	1.21654e-05
CALY	-5.08845	0.00148079
UHRF1	-3.42364	5.83173e-05
ADGRB1	-2.94206	0.00116251
SAMD4A	-1.18345	0.0312842
MCIDAS	-2.37881	0.0169745
NMRAL1	1.62099	0.0435283
PHLDA1	-3.05061	0.0136681
DOCK8	-3.5811	0.012961
LOC102184573	-3.8421	0.0134715
NTN4	-2.37884	7.79737e-07
TNIP2	-3.80982	0.0139176
SOGA3	-2.4839	0.0446873
SCAF1	-2.83182	0.0456005
HAPLN3	-2.86186	0.000894432
CBS	-1.69458	0.00130662
PRAP1	-6.4586	0.000816906
TSPAN5	-2.97053	6.49865e-06
CEP72	-3.92691	0.00166708
PTK2B	3.25191	0.0201102
DISP3	-4.51771	1.72339e-18
GULP1	-3.43907	0.0013313
FAM131B	-1.94782	0.0146072
GPC4	-1.87325	0.0021997
SGO1	-2.48044	8.07093e-05
KIAA1671	-2.32026	0.00171411
FOXL1	-3.61406	0.000530075
RBPJ	-2.92608	0.0464936
ATP6V1B1	-3.055	0.00200003
OXTR	5.24601	0.0146635
CASQ2	-3.70823	0.011723
ZYX	-1.7009	0.0196168
SYNPO2L	-3.11878	0.000173423
KRT80	-4.78681	1.68938e-05
DUOXA1	-4.23406	0.0424186
CD22	-5.69367	0.00150576
AQP1	-2.65828	0.0411462
TMPO	-2.72999	0.00295187
COLEC11	-3.61203	0.0233174
LRP4	-2.20445	0.0377581
CORO1A	-3.2564	0.00280449
RRM2	-2.94578	0.00295187
PLAG1	2.72675	0.000174218
CHCHD2	-1.82005	0.0371555
SH2B2	-3.07546	0.0336929
LOC102185430	-4.50144	0.0135932
CCSAP	-1.79837	0.017422
LOC102185432	-7.51004	0.0194316
MEGF10	-3.09564	0.00210609
FBL	-2.62793	0.00760431
CEP70	-3.39286	0.030723
CDSN	-3.95698	6.28864e-07
CARNMT1	-2.02402	0.0119637
MCAM	-4.93309	3.24586e-08
NPR3	2.09329	1.05735e-05
TAMALIN	-1.65764	0.0136681
MXD3	-2.71945	0.0331143
ANPEP	4.12912	0.0108207
KCNK17	-5.1563	0.000869302
GNAI1	2.41056	2.13057e-06
BATF2	-5.35647	0.00199685
PARP8	-7.09324	0.000107396
TRIP13	-1.51205	0.00935049
MAP7D2	-3.89276	0.0168264
C1QTNF5	-3.81001	0.00683919
PRPSAP1	1.2475	0.0196168
PRRT1B	-4.10596	0.0222807
AQP4	-5.6081	0.00123672
GNG11	2.06879	0.000395616
WWC2	-1.67617	0.0473048
PFKM	1.79182	0.000813667
LTA4H	2.63153	1.57252e-08
LGALS3	0.996959	0.0327053
EML6	2.31266	0.0421115
UPF3A	-2.68275	0.0268201
E2F2	-2.50844	0.0284826
DUSP5	-1.52474	0.00186601
ASPA	6.94877	8.92931e-05
MCM7	-1.42384	0.0196068
GINS4	-2.04769	0.000107396
HTATIP2	-3.9473	0.0478201
PTPN5	-3.65943	0.00114168
KLHL8	1.55406	0.0041931
COL5A3	-3.02341	0.0101581
LOC102186299	2.46617	0.0277488
LTB4R	-2.62581	0.00948255
JPH3	-4.53412	0.0223642
NSD2	-3.19813	0.00539526
TRPV1	4.21542	0.0179953
HROB	-1.94387	0.0381222
ITGA6	-1.31737	0.0335243
LOC102186557	-5.61514	0.0186495
LRIG3	1.14014	0.0488198
CHKA	-1.56432	0.0316549
PRDM8	-2.45637	0.0389028
LMNB1	-3.05831	0.00013733
TRDN	-4.89539	0.00315643
FAM217B	-4.30062	0.00295187
FUT4	-2.25567	0.0076508
PELP1	-2.96369	0.0321851
TRIM9	-2.2648	0.000953835
XKR4	-1.80625	0.0116589
TRIM21	-4.8657	0.00431608
SMAP2	-1.70051	0.0348338
SH3PXD2A	-2.27442	8.12729e-06
SPC24	-3.08612	0.0037421
KL	-4.09821	0.0113698
FGF2	-2.10796	0.00925921
H1-1	-2.76534	0.00193628
SLC4A8	1.91122	0.000188292
PUDP	-2.51492	0.0368985
GFRA3	-2.84191	0.0018491
CRISPLD2	1.65502	4.82289e-05
SLC7A5	-3.1477	1.26748e-07
AKNAD1	-4.2632	0.0172073
CGAS	-4.01204	0.00042167
PIGM	-4.71528	0.0029253
ORC1	-1.96219	0.0487144
LOC102187109	-3.21785	4.72036e-05
CDK5R1	-2.41541	0.0134856
SLC6A17	-2.59269	0.0091669
ANKDD1B	-3.40705	0.0443343
LOC102187233	-1.64181	0.00728766
GREB1	3.42297	0.00128543
KIF18B	-4.65719	1.83251e-05
ALOX12	-4.69735	0.0061268
MINPP1	-2.94637	0.0381222
C28H1orf198	-1.58384	0.000447916
GBX1	-4.07267	0.0184075
TRPV2	-1.39665	0.0400657
SLAMF9	-2.59922	0.0112314
ATF5	-1.30099	0.0401464
CAMK4	-3.25133	0.00323353
CD7	-3.72992	3.88638e-07
CCDC191	-3.54463	0.0455018
MAP3K1	-1.36453	0.0201823
RCN2	-1.21874	0.0133722
ADRB1	-3.87715	0.0304099
GCNT1	-4.55683	0.00511021
TC2N	-6.64185	0.000392274
ABCC9	-4.80295	0.00061739
CHADL	-5.76052	0.00719128
LOC102187676	-4.78561	0.00106377
XRRA1	1.4098	0.0282074
CENPT	-2.09247	0.000986269
CTNS	1.5527	0.00390654
SOCS3	-2.35703	0.0126223
RCCD1	-4.88543	0.00209834
DSG1	-8.36786	0.0029881
SPARCL1	2.8088	0.00632006
PTRH1	-2.85256	0.0195877
NIBAN1	-3.60323	0.000914686
KCNN4	-5.94024	0.00251685
SPAG5	-2.28674	7.28592e-06
CENPH	-1.56709	0.0161305
FBLN5	-5.15483	0.00135995
CTDP1	-3.0656	0.0308927
CPT1A	1.41132	0.00119883
LOC102187959	-7.99495	3.29662e-05
SLC30A1	-1.99787	0.0113656
LOC102187998	-2.68583	0.0416476
RAB27B	-5.40205	6.34272e-05
LOC102188008	-2.24907	0.00387681
DMP1	-4.46738	0.0141069
SPRY4	-4.47156	1.1311e-17
NR4A3	-1.77246	0.0123073
LOC102188072	-5.71309	1.01977e-06
SPTBN4	-4.67332	0.0102426
LOC102188103	-5.21183	0.00427737
UBXN2B	-3.6258	0.0124599
CCNB1	-2.31957	0.00248321
PPP1R3F	-2.1301	0.0234234
ADGRE5	-1.38176	0.0293468
LOC102188230	-2.93487	0.0341806
TK1	-3.40609	8.69545e-05
PRR11	-2.18303	0.0113656
DOCK10	-4.04627	0.00553846
FGL2	4.0845	7.84781e-09
COL12A1	2.39389	1.47854e-05
PPP1R16B	-5.8612	0.000865894
SLCO2B1	4.67074	0.000532457
TCP11L1	-4.60024	0.00300047
PATJ	2.39507	0.0130385
LIF	-2.83552	3.42255e-13
TMC8	-3.74103	0.00822723
LOC102188569	3.13288	0.0319448
WFS1	-2.45183	0.0113656
LOC102188618	-3.24776	0.00320646
DTYMK	-2.16277	0.0139735
ZNF608	1.63065	0.00327355
TOX	-5.38567	0.0169729
KMO	-4.05086	0.00471771
CLDN18	-6.41742	0.000345201
CARHSP1	-2.74685	0.00764393
ASF1B	-2.25632	0.00183574
PDE4A	-1.6479	0.00327951
GAP43	-5.26406	0.00229915
CXCR2	4.47361	0.0228025
KIF2C	-2.19185	0.0147446
NT5DC3	1.2315	0.0384132
C1R	2.34744	0.000310886
CFH	5.08561	0.000338391
LDLRAD2	-8.30523	0.0304099
POLD1	-2.54092	0.0418724
AFF2	2.54812	0.0312842
ZNF367	-2.10507	0.00894954
MFSD2A	-2.4433	0.0299305
PASK	-2.59348	0.0459022
ATRNL1	1.9217	0.0129957
SUGCT	-3.63374	0.034845
C25H16orf72	-2.86818	0.0200278
ARHGEF5	-2.97743	0.00564051
RTCB	-3.67042	0.0103882
TNFRSF13C	-4.5322	0.0321851
TCHHL1	-5.97321	0.0343889
RANGAP1	-3.03379	0.0179064
TTC39B	-2.39535	0.0443343
LPAR1	3.22369	0.00105173
ARRB1	-1.69084	0.0188781
GJA5	-5.7867	0.000164359
NFIA	2.42046	2.57512e-05
GFRA1	3.53243	1.68938e-05
SEC14L2	-1.73771	0.00315758
SCARA5	4.38045	0.000795991
CDC45	-1.77693	0.0145481
RAMP2	-2.53773	0.00231942
FAM117A	-3.04001	0.00862283
JAG2	-2.26402	0.0340346
LOC102189632	-4.70726	0.00272259
N4BP3	-3.27262	0.000947594
SHC3	-5.04342	1.13186e-06
TNS4	-3.66101	0.0172073
CLSTN2	-4.73282	0.00132102
C2CD2	-1.53086	0.0490894
HERC6	-4.25167	0.0041868
PXMP4	-3.99392	0.00961273
GPR83	-2.59083	0.00471614
ADCY5	-3.85291	1.05735e-05
MYCL	-3.47456	0.00220586
ARMC10	2.05563	0.0179064
SLBP	-1.70697	0.0117688
NXPH3	-1.40305	0.0161172
DUSP27	-3.14912	0.000276846
LOC102189920	-6.32106	0.000307347
CABLES1	-2.17008	0.000201982
LOC102189941	-5.84307	0.000877945
SOX11	-2.8945	0.0211683
CDT1	-4.45529	0.000310987
LOC102189985	-5.09888	0.00126506
IGSF10	6.21773	4.39218e-10
SH2D5	-5.01749	0.000629865
SMAD7	-1.54648	0.0412064
LOC102190250	-5.15803	0.0168264
RASL10A	-6.35659	0.00255297
TICRR	-3.11524	1.4612e-05
SYN3	-4.04205	0.042234
SLC3A1	3.29557	3.88638e-07
FER1L6	-4.15208	0.00235965
PRRX1	1.24917	0.0153073
CCNA2	-2.408	0.000296206
TCF19	-2.31931	0.000199082
TACC3	-3.525	0.00272888
PTGDR	-3.45553	0.0153222
LOC102190481	2.72681	0.043939
POLA2	-1.58624	0.000821194
C5H12orf75	-1.86892	0.000966342
LOC102190498	-4.35163	0.044506
TBX2	-4.48293	1.00067e-06
TP63	4.65183	4.69001e-11
CNN1	1.35957	0.018989
SYT13	-5.28368	0.000897334
FBXO31	-3.2374	0.0165576
MFAP4	2.37148	0.000217761
CCNO	-1.90066	0.0041786
THBS3	1.66533	0.00157776
FOLH1B	-1.65702	0.0475542
RRAS2	-1.12353	0.0442839
TMTC2	-1.91037	0.00102127
NUAK1	-1.08363	0.0170638
SLC16A2	1.38312	0.0146178
NIPSNAP1	-5.48395	0.00108449
HPCAL4	-4.02363	0.0410917
EMX2	-3.77612	0.0415774
EVA1B	-3.16572	0.00301931
CTSC	-1.45462	0.00309576
CRLF1	-2.96879	0.00640855
ALG11	-3.63873	0.00405491
SHANK1	-2.93308	0.0108207
CKAP4	-1.27004	0.04731
CCN2	-2.33484	0.00161849
LCTL	4.96562	3.2365e-10
RYR3	2.6538	0.0199985
C1QTNF12	-3.84181	0.0118148
GLUL	1.51607	0.0275507
STC2	-1.58174	0.0394142
SLC37A1	-1.378	0.0377581
OLFML3	1.19078	0.0170633
SHANK3	-3.3002	0.0228194
LOC102191152	-4.30082	0.00358616
TMBIM1	-2.92666	0.0267615
RPA4	3.29479	0.0164534
SHISA2	-4.17534	6.28864e-07
KLHL38	-4.23643	0.00255946
ACP5	-5.27086	0.00838459
B3GALT6	-3.41303	0.0101581
TGFB1	-2.35858	0.012044
CDK8	-1.36739	0.0458712
KIAA1549L	-2.52355	0.0153073
TNFRSF1B	-1.4548	0.0168264
WTIP	-2.11033	0.0443812
ATP10A	-2.28158	0.00600438
IL9R	-3.12051	0.0339599
ANKH	-2.18765	0.0344
ARL4C	-2.75169	5.37803e-05
SIK1	-2.43658	0.000193178
KIF22	-2.56232	0.00014982
PPFIA1	-1.45486	0.018247
CPE	-5.19986	0.0013313
GASK1B	-1.42251	0.00295187
GUCA1B	-3.65973	0.0222807
COL8A2	-2.19524	0.0428413
DIAPH2	1.4918	0.00506512
RELT	-2.36754	0.017378
FOXC2	-2.99112	0.000731685
KLHL34	-4.52187	0.0013313
LOC106501943	-4.01724	0.0115399
LOC106501944	-3.45011	0.0418384
SLC44A5	3.04003	0.00688696
ERFE	-4.61908	0.000722896
LOC106502017	-4.57662	0.00471614
MAGI2	1.63089	0.0135948
CCDC71L	-3.32617	0.0078462
ESYT2	-3.88002	0.0101055
LOC106502109	-4.37312	0.00743678
IL2RB	-5.69219	0.00136577
LOC106502136	-4.81466	0.00993983
LOC106502158	-5.03136	0.00119902
LOC106502244	-6.67168	0.0113212
F2RL3	-5.78851	0.000240171
KLF2	-2.8962	0.00896045
GDF1	-3.63883	0.00480924
IFI30	-2.29835	0.0222807
LOC106502300	-2.81576	0.0132067
LOC106502358	-4.79482	0.016399
LOC106502360	-3.8611	0.00221406
LOC106502367	-5.85381	0.00119522
LOC106502373	-6.53354	0.000345201
LOC106502391	-7.53626	8.60936e-05
C8H9orf40	-3.01762	0.00321505
GNA14	2.97911	0.00262109
LOC106502417	-4.88317	0.00278937
LOC106502433	-3.59977	0.0224021
SVEP1	2.04334	1.88538e-05
FAM110C	-4.75049	0.00478717
LOC106502458	-6.74688	0.00030489
LOC106502464	-4.0922	0.00295187
SYNJ2	-1.57381	0.00834862
LOC106502507	-6.60906	0.000337777
LOC106502552	-5.05703	0.00108449
C2CD4B	-4.98334	0.00924727
SIX1	1.72162	0.000922367
ITPRIPL1	-1.32833	0.0277488
ALK	-4.49855	0.000175958
LOC106502663	-5.56758	0.00167094
SAPCD2	-4.98846	0.000164359
LOC106502688	-6.7057	0.000629865
IL17D	-2.66244	0.0246993
FZD8	-1.41043	0.0491091
LOC106502759	-5.58132	0.00117073
LOC106502866	-3.9381	0.0104916
LOC106502879	-5.08438	0.00200472
FJX1	-2.23549	0.0488311
RTN4RL2	-4.2021	0.0141484
SELENOH	-3.04371	0.0131478
APLNR	-3.62944	0.000987321
LOC106502957	-4.90328	0.00284636
IER5	-4.19234	0.00434186
CIT	-2.3444	0.00345831
PPM1F	-2.91845	0.016399
GNB1L	-2.49469	0.0413194
NUDT19	-3.68646	0.00692747
DACT3	-3.18557	0.00270632
ZNF579	-2.90902	0.0411462
LOC106503189	-4.39788	0.00637756
HIC1	-2.73268	0.0203761
HES7	-3.7958	0.033731
FAM83G	-5.08047	0.00144747
SOX9	-3.00151	5.05058e-05
LOC106503350	-5.03547	0.00443337
LOC106503367	-5.77579	0.000740067
CKB	1.5328	0.0250542
LOC106503499	-2.00343	0.00136549
LOC106503501	-2.6748	1.65475e-05
LOC106503512	2.46364	0.0458732
MBP	-1.51871	0.0447905
NTN3	-4.41839	0.0414025
LOC106503599	-3.3289	0.00952094
ADAM8	-3.77057	0.0203761
LOC106503665	-6.62289	0.000130724
LOC106503722	-6.91557	0.000265837
VGF	-5.81221	0.000245089
CDC42EP5	-3.35892	0.0126673
LOC106503983	-3.7749	0.0435283
MAFK	-2.48488	0.0135863
PLEC	-2.68598	0.0493813
SPTBN5	-3.44718	0.00861295
LOC108633215	4.61906	5.88673e-14
TMEFF1	-3.06815	0.0037421
VPS26B	-3.03073	0.0173308
EXPH5	-4.02242	0.0113698
LOC108633303	5.89359	0.00255946
LOC108633328	-3.16586	0.0288067
TMEM40	-5.71682	0.0013313
TMEM158	-3.92791	9.47271e-06
LOC108633412	-3.11447	2.67448e-05
LOC108633413	-2.42264	0.000681163
LOC108633414	-23.8592	4.36935e-07
LOC108633791	-7.88929	0.00323353
LOC108633813	5.5018	0.000114439
LOC108633862	-6.83666	0.00220586
LOC108633863	-4.19268	0.0411924
LOC108633886	6.97431	4.72061e-05
TMEM204	-4.27224	1.93624e-06
LOC108633899	-4.88541	0.0277203
LOC108633924	-4.08086	5.50875e-14
LOC108634001	-3.22117	0.0305571
LOC108634020	3.11899	0.0029253
NANOS1	-3.6252	0.0335243
LOC108634033	-2.9187	0.039889
LOC108634066	-7.96598	0.00327951
KBTBD11	-4.74257	0.00083367
CITED4	-3.93007	9.36579e-05
PHLDA2	-4.98941	0.000130724
LOC108634207	-8.74017	0.00573397
B4GALNT4	-4.46555	0.0411924
LOC108634337	-4.39449	0.00164114
LOC108634432	-3.6753	0.0331746
LOC108634458	-7.83192	4.32684e-05
LOC108634473	-3.51756	0.0324489
LOC108634507	-5.85113	0.0303302
HIC2	-2.75731	0.0124614
TEDC1	-4.96063	9.06343e-05
LOC108634542	-6.6091	0.0377135
LOC108634545	-4.40737	0.00470351
LOC108634568	-4.1631	0.00980765
LOC108634577	-5.55169	0.000212028
SCARF2	-2.77634	0.0245415
LOC108634705	-3.04226	0.0250333
LOC108634722	3.63242	0.0310626
LOC108634738	-7.18936	0.000123076
LOC108634746	-4.49605	0.00231132
LOC108634747	-3.37054	0.0478201
LOC108634752	-4.40057	0.00746286
LOC108634770	-3.30411	0.0113698
LOC108634774	-3.91289	0.00590143
LOC108634776	-5.895	9.22732e-06
LOC108634820	-3.62522	0.0183262
LOC108634845	-6.61087	0.000144044
LOC108634846	-4.64536	0.00116245
LOC108634915	-8.06189	0.00327375
LOC108634953	-8.18299	0.00593557
LOC108634983	-2.89071	0.0441509
LOC108634985	-8.32276	0.00790367
LOC108634987	-9.76034	0.00132314
LOC108635027	-10.3052	0.000201982
LOC108635038	-7.85906	0.0232299
LOC108635078	-7.95542	0.00231942
LOC108635079	-7.2959	0.0107153
LOC108635080	-3.80121	0.0108207
LOC108635081	-6.68314	1.92095e-07
LOC108635099	-8.53042	0.0124653
LOC108635121	-10.0642	0.000520648
LOC108635142	-8.75512	0.000531301
LOC108635143	-1.46698	0.010182
LOC108635155	-3.36625	0.00272342
LOC108635241	-5.48517	0.00721942
LOC108635242	-6.13361	7.20183e-05
LOC108635278	-8.94689	0.00120756
LOC108635279	-9.50975	0.000787784
LOC108635296	-3.18283	0.00184323
LOC108635303	-4.80671	0.0069705
LOC108635391	-9.03344	0.00142074
LOC108635404	-5.91117	6.6038e-06
LOC108635405	-7.24346	1.68938e-05
LOC108635488	-4.2655	0.00478405
LOC108635549	-7.55004	0.0163888
LOC108635585	7.42777	7.28592e-06
LOC108635586	-8.82659	9.05335e-06
LOC108635587	-3.07852	0.0305571
LOC108635849	-7.40247	8.97211e-05
LOC108635871	-4.28174	0.0127221
LOC108635913	-3.83214	0.0291476
LOC108635914	-6.60039	0.000316296
LOC108635917	3.45882	0.0326803
LOC108635998	-4.84777	0.00564051
MGST1	2.26026	0.0440861
LOC108636062	-3.20715	0.0443102
PIM3	-2.62496	0.033731
LOC108636124	-4.67443	0.00334897
LOC108636217	-4.34473	0.00894999
LOC108636241	-4.74326	0.00390654
KLF16	-2.37139	0.0196049
CCDC192	-3.72326	0.0197443
LOC108636384	-7.67757	0.000123076
LOC108636401	-6.77525	0.000310886
LOC108636420	-3.35057	0.0474978
MX2	-4.93364	0.00251049
LOC108636462	-6.09157	0.000484959
LOC108636542	-4.74354	0.00437352
LOC108636648	-5.72792	0.00081028
LOC108636657	-6.0997	0.000631422
LOC108636659	-7.67006	7.27332e-05
LOC108636660	-6.69931	0.000330549
LOC108636661	-6.92293	0.000228854
LOC108636662	-7.69858	4.82289e-05
LOC108636663	-6.79385	0.000253753
LOC108636664	-7.04983	0.000151478
LOC108636665	-6.24192	0.000513635
LOC108636720	-6.03259	0.00496276
MARCKS	-2.56686	0.0162229
LOC108636725	-3.38846	0.00762275
LOC108636753	-6.36885	0.000163786
LOC108636854	-4.03079	0.00564051
LOC108637089	-4.18765	0.0057762
LOC108637100	-4.70007	0.0174083
LOC108637114	-5.90003	0.00261225
LOC108637131	-7.07772	0.000345201
LOC108637179	-3.18489	0.0226436
TOR4A	-4.27335	0.00418946
LOC108637293	-5.64002	0.00103626
LOC108637299	-1.69012	0.0291476
A3GALT2	-2.87669	0.00762275
LOC108637522	-4.8408	0.00427644
LOC108637654	-5.33237	0.000991931
LOC108637680	-2.93961	0.000960467
LOC108637760	-6.40186	0.000531301
LOC108637775	-4.58191	0.00524293
LOC108637776	-3.02526	0.00597311
LOC108637782	-5.60678	0.00213202
LOC108637794	-5.84828	0.000635431
LOC108637802	-3.60212	0.0113698
PHLDA3	-2.39851	0.0351829
LOC108637844	-4.42945	0.0120521
LOC108637861	-3.39453	0.0335243
LOC108637948	-5.32594	0.000655229
ZNF580	-2.72911	0.046114
LOC108638091	-3.91129	0.00573259
LOC108638092	-3.95284	0.0323186
LOC108638095	-4.51206	0.0487091
ZNF444	-3.6215	0.0124684
ZNF787	-3.18934	0.0173308
RNF225	-5.6036	0.00173985
LOC108638215	-4.79703	0.000137322
LOC108638232	-5.4911	0.00237491
LOC108638243	2.24585	0.00295187
LOC108638253	-2.33144	0.00045236
LOC108638254	-2.73149	0.0155759
EPOP	-3.04628	0.0319448
LOC108638297	-6.59015	2.40455e-14
LOC108638300	-7.71298	0.0377581
LOC108638312	-4.34128	2.13057e-06
LOC108638458	-6.21864	0.000731685
LOC108638481	-6.97875	0.00995317
LOC108638482	-5.96359	0.0406661
ANKRD9	-3.14724	0.0203085
LOC108638525	-3.32117	0.0249516
TLNRD1	-3.62265	0.005425
LOC108638614	-5.979	0.000405144
LOC108638618	-3.32914	0.0327761
LOC108638623	-5.45498	0.00231942
CAND2	-2.55007	0.000816906
